# Supplementary material for: Construction of the third-generation Zea mays haplotype map
Source: PubMed Central journal article supplement (PMC5890452; doi:10.1093/gigascience/gix134), 2017-12-30

|                                                      |                                                                                                                                                                                                                                                                                                                                                                                                                                                                                                                                                                                                                                                                                                                                                                                                                                                                                                           |                      |
|------------------------------------------------------|-----------------------------------------------------------------------------------------------------------------------------------------------------------------------------------------------------------------------------------------------------------------------------------------------------------------------------------------------------------------------------------------------------------------------------------------------------------------------------------------------------------------------------------------------------------------------------------------------------------------------------------------------------------------------------------------------------------------------------------------------------------------------------------------------------------------------------------------------------------------------------------------------------------|----------------------|
| <b>Manuscript Number:</b>                            | GIGA-D-17-00007                                                                                                                                                                                                                                                                                                                                                                                                                                                                                                                                                                                                                                                                                                                                                                                                                                                                                           |                      |
| <b>Full Title:</b>                                   | Construction of the third generation Zea mays haplotype map                                                                                                                                                                                                                                                                                                                                                                                                                                                                                                                                                                                                                                                                                                                                                                                                                                               |                      |
| <b>Article Type:</b>                                 | Research                                                                                                                                                                                                                                                                                                                                                                                                                                                                                                                                                                                                                                                                                                                                                                                                                                                                                                  |                      |
| <b>Funding Information:</b>                          | National Natural Science Foundation of China (CN) (#31271736)                                                                                                                                                                                                                                                                                                                                                                                                                                                                                                                                                                                                                                                                                                                                                                                                                                             | Not applicable       |
|                                                      | National Science Foundation (IOS #1238014)                                                                                                                                                                                                                                                                                                                                                                                                                                                                                                                                                                                                                                                                                                                                                                                                                                                                | Dr. Edward S Buckler |
|                                                      | Agricultural Research Service                                                                                                                                                                                                                                                                                                                                                                                                                                                                                                                                                                                                                                                                                                                                                                                                                                                                             | Dr. Edward S Buckler |
|                                                      | National Institute of Food and Agriculture (2009-65300-05668)                                                                                                                                                                                                                                                                                                                                                                                                                                                                                                                                                                                                                                                                                                                                                                                                                                             | Dr. Edward S Buckler |
|                                                      | Bill and Melinda Gates Foundation (US)                                                                                                                                                                                                                                                                                                                                                                                                                                                                                                                                                                                                                                                                                                                                                                                                                                                                    | Dr. Yunbi Xu         |
|                                                      | National Key Basic Research Program of China (2014CB138206)                                                                                                                                                                                                                                                                                                                                                                                                                                                                                                                                                                                                                                                                                                                                                                                                                                               | Not applicable       |
| <b>Abstract:</b>                                     | <p>Characterization of genetic variations in maize has been challenging, mainly due to deterioration of collinearity between individual genomes in the species. An international consortium of maize research groups combined resources to develop the maize haplotype version 3 (HapMap 3), built from whole genome sequencing data from 1,218 maize lines, covering pre-domestication and domesticated Zea mays varieties across the world.</p> <p>A new computational pipeline was set up to process over 12 trillion bp of sequencing data, and a set of population genetics filters were applied to identify over 83 million variant sites. We identified polymorphisms in regions where collinearity is largely preserved in the maize species. However, the fact that the B73 genome used as the reference only represents a fraction of all haplotypes is still an important limiting factor.</p> |                      |
| <b>Corresponding Author:</b>                         | Qi Sun<br>Cornell University<br>Ithaca, NY UNITED STATES                                                                                                                                                                                                                                                                                                                                                                                                                                                                                                                                                                                                                                                                                                                                                                                                                                                  |                      |
| <b>Corresponding Author Secondary Information:</b>   |                                                                                                                                                                                                                                                                                                                                                                                                                                                                                                                                                                                                                                                                                                                                                                                                                                                                                                           |                      |
| <b>Corresponding Author's Institution:</b>           | Cornell University                                                                                                                                                                                                                                                                                                                                                                                                                                                                                                                                                                                                                                                                                                                                                                                                                                                                                        |                      |
| <b>Corresponding Author's Secondary Institution:</b> |                                                                                                                                                                                                                                                                                                                                                                                                                                                                                                                                                                                                                                                                                                                                                                                                                                                                                                           |                      |
| <b>First Author:</b>                                 | Robert Bukowski                                                                                                                                                                                                                                                                                                                                                                                                                                                                                                                                                                                                                                                                                                                                                                                                                                                                                           |                      |
| <b>First Author Secondary Information:</b>           |                                                                                                                                                                                                                                                                                                                                                                                                                                                                                                                                                                                                                                                                                                                                                                                                                                                                                                           |                      |
| <b>Order of Authors:</b>                             | Robert Bukowski                                                                                                                                                                                                                                                                                                                                                                                                                                                                                                                                                                                                                                                                                                                                                                                                                                                                                           |                      |
|                                                      | Xiaosen Guo                                                                                                                                                                                                                                                                                                                                                                                                                                                                                                                                                                                                                                                                                                                                                                                                                                                                                               |                      |
|                                                      | Yanli Lu                                                                                                                                                                                                                                                                                                                                                                                                                                                                                                                                                                                                                                                                                                                                                                                                                                                                                                  |                      |
|                                                      | Cheng Zou                                                                                                                                                                                                                                                                                                                                                                                                                                                                                                                                                                                                                                                                                                                                                                                                                                                                                                 |                      |
|                                                      | Bing He                                                                                                                                                                                                                                                                                                                                                                                                                                                                                                                                                                                                                                                                                                                                                                                                                                                                                                   |                      |
|                                                      | Zhengqin Rong                                                                                                                                                                                                                                                                                                                                                                                                                                                                                                                                                                                                                                                                                                                                                                                                                                                                                             |                      |
|                                                      | Bo Wang                                                                                                                                                                                                                                                                                                                                                                                                                                                                                                                                                                                                                                                                                                                                                                                                                                                                                                   |                      |
|                                                      | Dawen Xu Xu                                                                                                                                                                                                                                                                                                                                                                                                                                                                                                                                                                                                                                                                                                                                                                                                                                                                                               |                      |
|                                                      | Bicheng Yang                                                                                                                                                                                                                                                                                                                                                                                                                                                                                                                                                                                                                                                                                                                                                                                                                                                                                              |                      |
|                                                      |                                                                                                                                                                                                                                                                                                                                                                                                                                                                                                                                                                                                                                                                                                                                                                                                                                                                                                           |                      |

|                                                                                                                                                                                                                                                                                                                                                                                                                              |                     |
|------------------------------------------------------------------------------------------------------------------------------------------------------------------------------------------------------------------------------------------------------------------------------------------------------------------------------------------------------------------------------------------------------------------------------|---------------------|
|                                                                                                                                                                                                                                                                                                                                                                                                                              | Chuanxiao Xie       |
|                                                                                                                                                                                                                                                                                                                                                                                                                              | Longjiang Fan       |
|                                                                                                                                                                                                                                                                                                                                                                                                                              | Shibin Gao          |
|                                                                                                                                                                                                                                                                                                                                                                                                                              | Xun Xu              |
|                                                                                                                                                                                                                                                                                                                                                                                                                              | Gengyun Zhang       |
|                                                                                                                                                                                                                                                                                                                                                                                                                              | Yingrui Li          |
|                                                                                                                                                                                                                                                                                                                                                                                                                              | Yinping Jiao        |
|                                                                                                                                                                                                                                                                                                                                                                                                                              | John Doebley        |
|                                                                                                                                                                                                                                                                                                                                                                                                                              | Jeffrey Ross-Ibarra |
|                                                                                                                                                                                                                                                                                                                                                                                                                              | Vince Buffalo       |
|                                                                                                                                                                                                                                                                                                                                                                                                                              | M. Cinta Romay      |
|                                                                                                                                                                                                                                                                                                                                                                                                                              | Edward S Buckler    |
|                                                                                                                                                                                                                                                                                                                                                                                                                              | Yunbi Xu            |
|                                                                                                                                                                                                                                                                                                                                                                                                                              | Doreen Ware         |
|                                                                                                                                                                                                                                                                                                                                                                                                                              | Jinsheng Lai        |
|                                                                                                                                                                                                                                                                                                                                                                                                                              | Qi Sun              |
| <b>Order of Authors Secondary Information:</b>                                                                                                                                                                                                                                                                                                                                                                               |                     |
| <b>Opposed Reviewers:</b>                                                                                                                                                                                                                                                                                                                                                                                                    |                     |
| <b>Additional Information:</b>                                                                                                                                                                                                                                                                                                                                                                                               |                     |
| <b>Question</b>                                                                                                                                                                                                                                                                                                                                                                                                              | <b>Response</b>     |
| Are you submitting this manuscript to a special series or article collection?                                                                                                                                                                                                                                                                                                                                                | No                  |
| <b>Experimental design and statistics</b><br><br>Full details of the experimental design and statistical methods used should be given in the Methods section, as detailed in our <a href="#">Minimum Standards Reporting Checklist</a> . Information essential to interpreting the data presented should be made available in the figure legends.<br><br>Have you included all the information requested in your manuscript? | Yes                 |
| <b>Resources</b><br><br>A description of all resources used, including antibodies, cell lines, animals and software tools, with enough information to allow them to be uniquely identified, should be included in the Methods section. Authors are strongly encouraged to cite <a href="#">Research Resource Identifiers</a> (RRIDs) for antibodies, model organisms and tools, where possible.                              | Yes                 |

|                                                                                                                                                                                                                                                                                                                                                                                                                                                                                                                                                         |     |
|---------------------------------------------------------------------------------------------------------------------------------------------------------------------------------------------------------------------------------------------------------------------------------------------------------------------------------------------------------------------------------------------------------------------------------------------------------------------------------------------------------------------------------------------------------|-----|
| <p>Have you included the information requested as detailed in our <a href="#">Minimum Standards Reporting Checklist</a>?</p>                                                                                                                                                                                                                                                                                                                                                                                                                            |     |
| <p><b>Availability of data and materials</b></p> <p>All datasets and code on which the conclusions of the paper rely must be either included in your submission or deposited in <a href="#">publicly available repositories</a> (where available and ethically appropriate), referencing such data using a unique identifier in the references and in the “Availability of Data and Materials” section of your manuscript.</p> <p>Have you have met the above requirement as detailed in our <a href="#">Minimum Standards Reporting Checklist</a>?</p> | Yes |

# Construction of the third generation *Zea mays* haplotype map

Robert Bukowski<sup>1</sup>, Xiaosen Guo<sup>2,3</sup>, Yanli Lu<sup>4</sup>, Cheng Zou<sup>5</sup>, Bing He<sup>2</sup>, Zhengqin Rong<sup>2</sup>, Bo Wang<sup>2</sup>, Dawen Xu<sup>2</sup>, Bicheng Yang<sup>2</sup>, Chuanxiao Xie<sup>5</sup>, Longjiang Fan<sup>6</sup>, Shibin Gao<sup>4</sup>, Xun Xu<sup>2</sup>, Gengyun Zhang<sup>2</sup>, Yingrui Li<sup>2</sup>, Yinping Jiao<sup>7</sup>, John Doebley<sup>8</sup>, Jeffrey Ross-Ibarra<sup>9</sup>, Vince Buffalo<sup>9</sup>, M. Cinta Romay<sup>10</sup>, Edward S. Buckler<sup>10,11</sup>

## *Corresponding authors:*

Yunbi Xu<sup>5,12</sup>, Jinsheng Lai<sup>13</sup>, Doreen Ware<sup>7</sup>, and Qi Sun<sup>1</sup>

## *Authors' affiliations:*

<sup>1</sup>Bioinformatics Facility, Institute of Biotechnology, Cornell University, Ithaca, NY 14853

<sup>2</sup>BGI-Shenzhen, Shenzhen 518083, China

<sup>3</sup>Department of Biology, University of Copenhagen, Ole Maaløes Vej 5, DK-2200 Copenhagen, Denmark

<sup>4</sup>Maize Research Institute, Sichuan Agricultural University, Wenjiang 611130, Sichuan, China

<sup>5</sup>Institute of Crop Science, Chinese Academy of Agricultural Sciences/National Key Facilities for Crop Gene Resource and Genetic Improvement, Beijing 100081, China

<sup>6</sup>Institute of Crop Science and Institute of Bioinformatics, Department of Agronomy, Zhejiang University, Hangzhou 310058, China

<sup>7</sup>Cold Spring Harbor Laboratory, Cold Spring Harbor, New York, USA

<sup>8</sup>Department of Genetics, University of Wisconsin, Madison, Wisconsin, USA

<sup>9</sup>Department of Plant Sciences, University of California, Davis, California, USA

<sup>10</sup>Institute for Genomic Diversity, Cornell University, Ithaca, NY 14853

<sup>11</sup>US Department of Agriculture-Agricultural Research Service, Ithaca, NY 14853

<sup>12</sup>International Maize and Wheat Improvement Center (CIMMYT), El Batan 56130, Texcoco, Mexico

<sup>13</sup>National Maize Improvement Center, China Agricultural University

1  
2  
3  
4 **ABSTRACT**  
5  
6

7 **Background**  
8  
9

10  
11 Characterization of genetic variations in maize has been challenging, mainly due to deterioration of  
12  
13 collinearity between individual genomes in the species. An international consortium of maize research  
14  
15 groups combined resources to develop the maize haplotype version 3 (HapMap 3), built from whole  
16  
17 genome sequencing data from 1,218 maize lines, covering pre-domestication and domesticated *Zea mays*  
18  
19 varieties across the world.  
20  
21

22  
23  
24 **Results**  
25  
26

27  
28 A new computational pipeline was set up to process over 12 trillion bp of sequencing data, and a set of  
29  
30 population genetics filters were applied to identify over 83 million variant sites.  
31  
32

33 **Conclusions**  
34  
35

36  
37 We identified polymorphisms in regions where collinearity is largely preserved in the maize species.  
38  
39 However, the fact that the B73 genome used as the reference only represents a fraction of all haplotypes  
40  
41 is still an important limiting factor.  
42  
43

44 **KEYWORDS**  
45  
46

47  
48 *Zea mays*, sequencing, haplotype map, genotyping, variant discovery, linkage disequilibrium, identity by  
49  
50 descent, imputation  
51  
52

53  
54 **BACKGROUND**  
55  
56

57  
58 Maize, one of the most important cereals in the world, also happens to be among the crop species with  
59  
60 the most genetic diversity. Advances in the next generation sequencing technologies made it possible to  
61  
62

1  
2  
3  
4 characterize genetic variations in maize at genomic scale. The previously released maize HapMap2 were  
5  
6 constructed with whole genome sequencing data of 104 maize lines across pre-domestication and  
7  
8 domesticated *Zea mays* varieties [1]. Since then, more maize lines have been sequenced by the  
9  
10 international research community, and a consortium was formed to develop the next generation  
11  
12 haplotype map. The maize HapMap 3 consortium includes, among others, BGI-Shenzen, Chinese Academy  
13  
14 of Agricultural Sciences, China Agricultural University, International Maize and Wheat Improvement  
15  
16 Center (CIMMYT). High-coverage data for 31 European and US Flint and Dent lines is also available in Ref.  
17  
18 [2]. Altogether, in this work we used a total of 1218 maize lines sequenced with depth varying from below  
19  
20 1x to 59x.  
21  
22  
23  
24  
25

26 A common approach in today's genetic diversity projects is to map the shotgun sequencing reads from  
27  
28 each individual onto a common reference genome to identify DNA sequence variations, and the physical  
29  
30 positions of the reference genome is used as a coordinate system for the polymorphic sites. A good  
31  
32 example is the human 1000 genome project [3]. The computational data processing pipeline developed  
33  
34 for the human project, GATK, has been widely adopted for identifying genetic variations in many other  
35  
36 species [4].  
37  
38  
39  
40

41 As the sequencing technology is improved and sequencers' base calling error model gets more accurate,  
42  
43 the computational challenges in genotyping by short-read sequencing have shifted from modeling  
44  
45 sequencer machine artifacts errors to resolving genotyping errors derived from incorrect mapping of short  
46  
47 reads to the reference genome. The problem is associated with the experimental design that uses the  
48  
49 single-reference genome as coordinate system. Taking maize as an example, the reference being used is  
50  
51 a 2.1 Gb assembly from an elite inbred line B73 that represents 91% of the B73 genome [5], and was  
52  
53 estimated to capture only ~70% of the low-copy gene fraction of all inbred lines [6]. The sequence  
54  
55 alignment software, however, can map 95-98% of the whole genome sequencing reads to the reference.  
56  
57  
58 That suggests a high percentage of the reads were mapped incorrectly, either being mapped to the  
59  
60  
61  
62  
63  
64  
65

1  
2  
3  
4 paralogous loci or highly repetitive regions under-represented in the reference assembly. The genetic  
5  
6 variants called from the miss-mapped reads need to be corrected computationally. The maize HapMap2  
7  
8 relied on linkage disequilibrium in the population to purge most of the bad markers caused by alignment  
9  
10 errors. To construct maize HapMap 3, a new computational pipeline was developed from scratch to  
11  
12 handle the sequencing data from 10 times more lines, and also took advantage of the high quality genetic  
13  
14 map constructed from the GBS technology [7, 8] which was not present when HapMap2 was constructed.  
15  
16  
17

18  
19 Genome structure variation in the population, including transposition, deletion, duplication and inversion  
20  
21 of the genomic segments, poses another challenge in the HapMap projects. As the physical genomes of  
22  
23 each of the individuals included in the HapMap projects vary both by size and structure, and there is no  
24  
25 co-linearity of all the sequence variants between the reference and genomes of each of the individuals, it  
26  
27 is not always possible to anchor all genetic variants in a population onto a single reference coordinate  
28  
29 system. As a compromise, markers included in the maize HapMap are defined as sites of which the  
30  
31 physical positions of the B73 alleles matching the markers' consensus genetic mapped positions.  
32  
33  
34

35  
36 Here we present maize haplotype map version 3 (HapMap 3), which is a result of coordinated efforts of  
37  
38 the international maize research community. The build includes 1,218 lines and over 83 million variant  
39  
40 sites anchored to the B73 reference genome version AGP v3.  
41  
42  
43

## 44 45 DATA DESCRIPTION

46  
47  
48 The sequencing data used in this work is comprised of 12,497 billion base pairs in a total of 113,702 billion  
49  
50 Illumina paired-end reads, originating from 1,218 maize and teosinte lines. The data was collected from  
51  
52 several sources over several years, and varies in quality, read length, and coverage. Basic information  
53  
54 about various datasets and stages of the HapMap 3 project they were used in are summarized in Table 1.  
55  
56 Each of the 1,218 lines were sequenced at depth varying from below 1x to 59x, using reads of lengths  
57  
58 ranging from 44 through 201bp, averaging 110 bp. All reads were aligned to maize reference genome B73  
59  
60  
61

version AGP v3 using BWA mem aligner [9]. Overall, 95-98% of the reads were mapped to the reference genome, although only about 50-60% with non-zero mapping quality.

Table 1: Sequence datasets used in various stages of HapMap 3

| Dataset          | # Taxa | Coverage per taxon (min,max,average) | 3.1.1, 3.2.1unimp, 3.2.1imp |
|------------------|--------|--------------------------------------|-----------------------------|
| HapMap2          | 103    | (1,18.5,4.1)                         | +++                         |
| Hapmap2 extra    | 44     | (4.2,42,11.5)                        | +++                         |
| CAU              | 725    | (0.06,36.8,1.75)                     | +++                         |
| CIMMYT/BGI       | 89     | (1.1,19,11)                          | +++                         |
| 282-2x           | 271    | (0,9,2.2)                            | -++                         |
| 282-4x           | 270    | (0.6,34.5,4.4)                       | --+                         |
| German, Ref. [2] | 31     | (8.3,59,17.4)                        | -++                         |

Taxa from sets “HapMap2”, “HapMap2 extra”, and “CAU” partially overlap. The “282” libraries, sequenced twice represent 271 taxa. A “+” means that the dataset was used in a given stage, “-” that it was not.

All sequence data used in this work is publically available. Collection and publishing of this data does not violate any local or international legislation or guidelines.

## ANALYSIS

### Initial variant discovery

The HapMap 3 pipeline is summarized in Figure 1. First, polymorphic sites were called for a set of 916 taxa from datasets HapMap2 through CIMYYT/BGI (7,191 billion base pairs, 74,643 million reads). In the first step, a custom built software tool was used to determine genotypes for each taxon at each site of the genome based on allelic depths at that site. Bases counted towards depth had base quality score of at least 10 and originated from reads with mapping quality at or above 30. Only sites where at least 10 taxa had coverage of 1 or more were considered. The allelic depths were subject to segregation test (ST – see next section), which determines the probability that a given distribution of allelic depths over taxa has been obtained by chance. Sites with high probability, which are likely a result of random sequencing



errors, have been eliminated by applying a p-value threshold of 0.01. In this first round, a total of 196 million tentative polymorphic sites were selected. In the second step, these sites were filtered using the identity by descent (IBD) information derived from about 0.5 million of high-quality polymorphisms obtained previously [8] using the Genotyping-By-Sequencing (GBS) approach [7]. These GBS variants (GBS anchor) were used to determine regions of IBD, where certain pairs of taxa are expected to have identical haplotypes. The raw tentative polymorphisms violating these IBD constraints were then filtered out, leaving 96.8 million sites. At roughly half of the sites surviving this filter, minor allele was not present in IBD contrasts. Such sites, typically with low minor allele frequency, are less reliable and have been marked with “IBD1” flag in the VCF files (see Table 2 for summary of flags and parameters present in HapMap 3 VCF files). The ST- and IBD-filtered variant sites were then used in two separate procedures, leading to two versions of HapMap 3 genotypes, referred to as HapMap 3.1.1 and HapMap 3.2.1.

Table 2: Flags and parameters used in INFO field of VCF files in various HapMap 3 versions

| Parameter | 3.1.1,<br>3.2.1unimp,<br>3.2.1imp | Description                                                                                                                |
|-----------|-----------------------------------|----------------------------------------------------------------------------------------------------------------------------|
| DP        | +++                               | Total read depth at the site                                                                                               |
| NZ        | +++                               | Number of taxa with called genotypes                                                                                       |
| AD        | +++                               | Allelic depths (reference, alternative in order listed in ALT field)                                                       |
| AC        | +++                               | Numbers of alternative alleles in order listed in ALT field                                                                |
| AQ        | +++                               | Average allele base qualities (reference, alternative in order listed in ALT field) computed in HapMap 3.1.1 from 916 taxa |
| GN        | +++                               | Numbers of genotypes (AA,AB,BB or AA,AB,AC,BB,BC,CC if 2 alt alleles present)                                              |
| HT        | +++                               | Number of heterozygotes                                                                                                    |
| EF        | +++                               | EF=heterozygosity/(presence_frequency*minor_allele_frequency); computed in HapMap 3.1.1 from 916 taxa                      |
| PV        | +++                               | p-value from segregation test, computed in HapMap 3.1.1 from 916 taxa                                                      |
| MAF       | +++                               | Minor allele frequency (summed up over all alternative alleles)                                                            |

|                  |      |                                                                                                     |
|------------------|------|-----------------------------------------------------------------------------------------------------|
| MAF0             | --+  | Minor allele frequency in unimputed HapMap 3.2.1.                                                   |
| FH               | +--  | Fraction of heterozygous taxa among the 506 taxa with more than 50% non-missing genotypes on chr 10 |
| FH2              | +--  | Site with FH greater than 2%                                                                        |
| IBD1             | +++  | only one allele present in IBD contrasts - based on 916 taxa of HapMap 3.1.1                        |
| LLD              | +++  | Site in local LD with GBS map - based on 916 taxa of HapMap 3.1.1                                   |
| NI5              | +++  | Indel or site within 5bp of a putative indel - from 916 taxa of HapMap 3.1.1                        |
| INHMP311         | -++  | Site present in HapMap 3.1.1                                                                        |
| ImpHomoAccuracy  | --+  | Fraction of homozygotes imputed back into homozygotes                                               |
| ImpMinorAccuracy | ---+ | Fraction of minor allele homozygotes imputed back into minor allele homozygotes                     |
| DUP              | --+  | Site with heterozygotes frequency > 3% - based on unimputed HapMap 3.2.1 genotypes                  |

. "+" and "-" indicate presence or absence, respectively, of a parameter or flag in a given version of HapMap. For example, "-++" means the parameter is present in VCF file of both unimputed and imputed HapMap 3.2.1, and absent from HapMap 3.1.1. VCF files. Unless indicated otherwise, all parameters are computed from depths and genotypes in the current VCF file.

### HapMap 3.1.1

The HapMap 3.1.1 procedure involved checking for linkage disequilibrium of each site against the GBS anchor map [7, 8], which consists of markers located in hypo-methylated and genetically stable regions. Sites giving only very weak or only nonlocal (i.e., outside of 1 Mb radius) linkage Disequilibrium (LD) hits were eliminated, which resulted in the final set of 61,228,639 polymorphisms. For slightly less than 40% of these sites, LD could not be conclusively calculated due to small minor allele frequencies (MAF), whereas the remaining sites, confirmed to be in local LD with the GBS anchor, have been marked with flag "LLD". Among the sites surviving all filtering steps, 8.7 million are indels or are located near (within 5bp) of an indel. These have been marked with the flag "NI5". Since a procedure to achieve consistent alignment across all reads covering the same indels - local realignment - has not been performed,

1  
2  
3  
4 genotyping errors could occur, and, consequently, most such sites are tentative and should be treated  
5  
6 with caution.  
7

8  
9  
10 Figure 2 shows overlaps between various classes of variants of HapMap 3.1.1. First, we notice a rather  
11  
12 small overlap between sites in confirmed local LD (“LLD” flag) and those marked “IBD1”. This is  
13  
14 understandable, as the IBD1 sites represent mostly low MAF cases, where LD assessment could not be  
15  
16 done. Indels and vicinity (labeled “NI5”) constitute about 15% of sites in each of the LLD, IBD1, and the  
17  
18 union of LLD and IBD1 sets. Only a very small fraction of sites does not carry LLD or IBD1 flag, i.e., they are  
19  
20 strongly confirmed by the IBD filter, but could not be classified with LD. The subset of 29.8 million sites in  
21  
22 local LD and away from indels should be considered the most reliable.  
23  
24

25  
26  
27 To check the sensitivity of the obtained variant set to the mapping quality threshold imposed on the reads  
28  
29 counted towards allelic depths, we repeated the pipeline using the mapping quality threshold equal to 1.  
30  
31 Comparison of the variant set obtained this way (q1) with our recommended set (q30) is shown in Figure  
32  
33 3. While the overall number of variant sites is approximately independent of the mapping quality  
34  
35 threshold, the two pipelines produce significantly different sets of sites, with only 72% of all “q30” sites  
36  
37 reproduced by the “q1” pipeline. Closer inspection shows that this variability is due primarily to the IBD1  
38  
39 sites, for which our filtering strategy was the least stringent. On the other hand, the LLD sites, confirmed  
40  
41 to be in local LD with GBS anchor, are much more independent of the mapping quality threshold, which  
42  
43 confirms high quality of such sites.  
44  
45  
46

47  
48  
49 Importance of choosing a sufficiently tight mapping quality threshold is apparent from Figure 4, where  
50  
51 the distribution of inbreeding coefficient computed for chromosome 10 is shown for variant sets obtained  
52  
53 with thresholds 1 and 30. The lower threshold results in a large number of miss-mapped reads being  
54  
55 counted towards depth, producing overly heterozygous genotypes, especially for highly covered taxa (the  
56  
57 peak below 0.8 is due mostly to CIMMYT lines with 10-15x coverage; these lines have higher  
58  
59  
60  
61  
62  
63  
64  
65

1  
2  
3  
4 heterozygosity than other lines which may also contribute to the peak) and thus shifting the curve to the  
5  
6 left. Since most HapMap 3 taxa are inbred lines, one should expect the true distribution to be contained  
7  
8 within peak around 0.95. In view of this, the “q30” result is definitely an improvement over “q1”, although  
9  
10 a longer than expected tail extending towards the value 0.8 indicates that the HapMap 3 variants may  
11  
12 contain too many false heterozygotes.  
13  
14

15  
16  
17 Seemingly heterozygous sites may result from either sequencing errors or misalignments of reads  
18  
19 originating from paralogous regions. To investigate this further, we calculated, for each site, the fraction  
20  
21 of heterozygous HapMap 3.1.1 genotypes within a subset of 506 high-coverage taxa (defined as those  
22  
23 with more than 50% non-missing genotypes on chromosome 10). In HapMap 3.1.1 VCF files, this fraction  
24  
25 has been recorded as parameter “FH”. At sites for which this parameter exceeds 2-3%, heterozygotes are  
26  
27 likely to originate from misalignments, for example, from tandem and ectopic duplications. Such sites  
28  
29 constitute 9% of all HapMap 3.1.1 sites.  
30  
31  
32

### 33 34 HapMap 3.2.1 35

36  
37 The 96.8 million ST- and IBD-filtered variant sites were the starting point for the HapMap 3.2.1 procedure  
38  
39 (Figure 1). On these sites, genotypes were called on the 263 taxa from the “282” panel of Ref. [10] using  
40  
41 “282 2x” dataset, and on the 31 high-coverage (on average 17 x) “German” taxa [2], for the total of 1210  
42  
43 taxa. Some of the taxa present in the “282” and “German” sets carry the same names as the ones included  
44  
45 in the 916-taxa HapMap 3.1.1 set. Since despite identical names such taxa often originate from different  
46  
47 germplasm sources, they have been kept separate during genotyping, i.e., reads from different sources  
48  
49 were not merged and separate genotypes were computed for each source. In the resulting VCF files, the  
50  
51 names of the overlapping taxa have been prefixed by “282set\_” and “german\_”. For example, in the case  
52  
53 of B73, there are three columns representing different datasets for this taxon: “B73” (the original 916-  
54  
55  
56  
57  
58  
59  
60  
61  
62  
63  
64  
65

1  
2  
3  
4 taxa set), “282set\_B73” (sequence from the more recent “282” libraries), and “german\_B73” (from Ref.  
5  
6 [2]).  
7  
8

9  
10 To further eliminate the false positives resulting from sequencing errors, an additional depth-based filter  
11 was applied to the 96.8 million sites. Referred to as “>1,>2” filter it accepts sites for which the read support  
12 of minor allele was greater than 1 in at least one taxon and greater than 2 across all taxa. Genotypes on  
13 the surviving 83,153,144 sites, referred to as “un-imputed HapMap 3.2.1”, were then processed through  
14 the LD KNN imputation procedure based on Ref. [11], where the “nearest neighbors” of a given line are  
15 selected based on sites in good local LD with the target site. Whenever possible, the procedure filled up  
16 missing genotypes with imputed ones, but the non-missing genotypes were left unchanged, even if  
17 imputation classified them differently. Non-imputable missing genotypes at the sites with (pre-  
18 imputation) MAF below 1% were assumed to be major allele homozygotes. Imputation reduces the  
19 fraction of missing genotypes from 50% to 7%. Most of the originally missing genotypes (about 85%) are  
20 imputed to major allele homozygotes. Accuracy of the genotype dataset can be assessed by comparing  
21 the original genotypes with imputed ones. As shown in Table 3, 99.8% of major allele homozygotes are  
22 imputed back into the same class. While the accuracies of minor allele homozygotes and genotypes  
23 including indels are both above 90%, only 11% of heterozygotes are imputed back into the same class,  
24 while 47% of them fail imputation altogether. This reflects the inherent difficulty in calling heterozygotes.  
25 In the single-reference approach to maize genotyping employed here, heterozygous sites represent true  
26 residual heterozygosity as well as misalignments of reads from tandem and ectopic duplications. Since  
27 residual heterozygosity in our population of predominantly inbred lines should not exceed 2-3%, all  
28 heterozygotes with frequency  $\geq 3\%$  can be considered a result of misalignments. About 10% of all  
29 heterozygotes present in HapMap 3.2.1 set satisfy this condition. In the VCF files, these sites have been  
30 flagged with flag DUP. Other parameters generated by the imputation procedure and recorded for each  
31 variant site in the INFO field are ImpHomoAccuracy fraction of all homozygotes imputed back into  
32  
33  
34  
35  
36  
37  
38  
39  
40  
41  
42  
43  
44  
45  
46  
47  
48  
49  
50  
51  
52  
53  
54  
55  
56  
57  
58  
59  
60  
61  
62  
63  
64  
65

1  
2  
3  
4 homozygotes and ImpMinorAccuracy fraction of minor allele homozygotes imputed back to the same  
5  
6 class. The INFO field also contains flags IBD1, LLD, and NI5, computed from the initial 916 taxa in the  
7  
8 HapMap 3.1.1 procedure. Genotypes resulting from the imputation procedure are referred to as “imputed  
9  
10 HapMap 3.2.1”.

11  
12  
13  
14 Table 3: Accuracy of various genotype classes based on statistics from imputation in HapMap 3.2.1

15  
16  
17

| Genotype class          | Accuracy within class [%] | % unimputed |
|-------------------------|---------------------------|-------------|
| Major allele homozygote | 99.8                      | 1.2         |
| Heterozygote            | 11.1                      | 47.0        |
| Minor allele homozygote | 94.4                      | 14.2        |
| Indel                   | 92.2                      | 17.3        |

18  
19  
20  
21  
22  
23

24 Accuracy computed as percentage of the original number of genotypes in a given class (excluding  
25  
26 genotypes that could not be imputed) imputed into the same class. The last column shows the fraction of  
27  
28 genotypes within a class which could not be imputed.

29  
30  
31  
32 Relationship between variant sites included in HapMap 3.1.1 and 3.2.1 is shown in Figure 5. Both pipelines  
33  
34 start from the same set of IBD-filtered genotypes and subject them to different kinds of filtering, with that  
35  
36 of HapMap 3.1.1 being more stringent. It is therefore not surprising that HapMap 3.2.1 recovers the  
37  
38 majority (86%) of HapMap 3.1.1 sites, including over 99% of those flagged LLD (i.e., confirmed in local LD).  
39  
40 In addition, 30.3 million extra sites are retained in HapMap 3.2.1, which filed the LD filer in HapMap 3.1.1  
41  
42 pipeline. On the other hand, the depth-based “>1,>2” filter applied in HapMap 3.2.1 eliminated 8.2 million  
43  
44 sites present in HapMap 3.1.1, including about 0.2 million LLD ones.

45  
46  
47  
48  
49 After the HapMap 3.2.1 release was completed, “282-2x” sequencing data became available for additional  
50  
51 8 taxa from the “282” panel. Libraries for all 271 taxa were also re-sequenced at a higher depth (average  
52  
53 of about 4.4x), leading to another dataset, “282-4x” (as this re-sequencing failed for one of the taxa, this  
54  
55 dataset only contained 270 taxa). Therefore, the un-imputed HapMap 3.2.1 genotypes for all 271-taxa  
56  
57  
58  
59  
60  
61  
62  
63  
64  
65

1  
2  
3  
4 from the “282” panel were re-called using the full available sequencing depth, creating a separate variant  
5  
6 dataset for the “282” panel.  
7  
8  
9

## 10 DISCUSSION

11  
12 The maize genome, 2.3 GB in size [5], is smaller than the human genome. But some of its distinctive  
13 features makes it more challenging for variants identification. First, a recent whole genome duplication  
14 occurred 12 million years ago resulted in homologous segments that complicate the short read  
15 alignments; second, the rampant activities of transposable elements within last 1-5 million year not only  
16 resulted in accumulation of large amount of relatively young repetitive elements in the intergenic regions,  
17 but also extraordinary structural variations within species [5, 6]. In this study, the genome of the B73  
18 maize line was used as the reference for variant calling from short sequencing reads. Structural variations  
19 between B73 and other individuals has been the major challenge for identification of true variants. In  
20 particular, short reads derived from regions missing in the reference genome could be mapped to  
21 other paralogous regions, which lead to false positive genotypes. In the human 1000 genome project, a  
22 new HaplotypeCaller was used [4], which performs local *de novo* assembly to identify the most likely  
23 haplotypes for each individual and thus improve the genotyping results. However, HaplotypeCaller is  
24 computationally very expensive, and not always applicable in species like maize, where the single  
25 reference genome misses many haplotypes presents in the species and has a lot more mapped  
26 paralogous reads that would disrupt the local assembly. To filter out these false positive variants called  
27 from the mapped reads, we relied on the *Zea* GBS map [7, 8], which was obtained from GBS markers  
28 located primarily in hypo-methylated chromosomal regions. GBS maps were used to identify IBD regions  
29 between the individual genomes, and 100 million markers with high percentage of mismatched genotype  
30 calls in the IBD regions were filtered out from the initial set of 196 million markers. The highly repetitive  
31 genomic regions derived from recent transposition activities are in general easier to identify, because the  
32  
33  
34  
35  
36  
37  
38  
39  
40  
41  
42  
43  
44  
45  
46  
47  
48  
49  
50  
51  
52  
53  
54  
55  
56  
57  
58  
59  
60  
61  
62  
63  
64  
65

1  
2  
3  
4 templates of these repeats are well represented on the reference genome, and sequencing reads mapped  
5  
6 to these regions, flagged with low mapping quality, can be removed at the early stage of the analysis  
7  
8 pipeline. For HapMap 3, reads with mapping quality lower than 30 were not included in the build.  
9

10  
11 One of the goals of HapMap 3.1.1 is to identify genetic markers in regions where collinearity is preserved  
12  
13 in majority of maize lines. The LD filter in the pipeline was applied for this purpose. To do this, we  
14  
15 genetically mapped the presence/absence of the minor alleles using the GBS genetic map, and these  
16  
17 mapped genetic positions were compared to the physical positions on the B73 reference. Among the 96.8  
18  
19 million sites surviving the IBD filter, 25% did not have enough non-missing data or sufficient minor allele  
20  
21 frequency for genetic mapping to be meaningful. For 38% of sites, at least one genetically mapped  
22  
23 position matching the physical positions on B73 reference was found, 24% have no significant hits from  
24  
25 genetic mapping, probably due to no consensus positions in the HapMap 3 population, and 13% have  
26  
27 genetic positions not matching the B73 physical positions. Markers from the latter two categories (37% of  
28  
29 all IBD-filtered markers) were removed by the LD filter, leaving slightly over 61 million sites, about 60% of  
30  
31 which were confirmed in local LD and marked with a flag “LLD” in VCF files.  
32  
33  
34  
35  
36  
37  
38

39 The IBD and LD filters applied in the HapMap 3.1.1 project effectively remove majority of the false positive  
40  
41 genetic variants caused by paralogous genomic regions, as well as markers with lost collinearity between  
42  
43 the species. However, not all the genotyping errors have been removed from the release. 23,839,286 of  
44  
45 the sites do not have sufficient minor allele frequency for genetic test (these are missing the “LLD” label  
46  
47 in the INFO field of the VCF files). Another source of errors are paralogous regions evolved from tandem  
48  
49 duplications. Misalignments of reads from such regions result in false heterozygous genotypes with  
50  
51 relatively high frequency and in local LD, and therefore difficult to filter out. Given enough sequencing  
52  
53 depth, the tandem duplications can be identified either as copy number variation or imputation errors.  
54  
55 However, majority of the HapMap 3 lines have very low sequencing depth, and fail to sample all  
56  
57 paralogous loci or all alleles, which makes it difficult to flag all sites complicated by tandem duplications.  
58  
59  
60  
61  
62  
63  
64  
65



1  
2  
3  
4 Local LD filter based on a large, diverse population may be too stringent, as some markers, good within  
5  
6 certain sub-populations, may be thrown out. Therefore, the LD filter was not used in the HapMap 3.2.1  
7  
8 release, which contains a total of 83 million variant sites, subject only to ST and IBD filters and an  
9  
10 additional depth-based filter aimed to improve reliability of rare allele calls. Although those sites are likely  
11  
12 to have higher misalignment rates, they are still likely to capture real signal related to phenotypic  
13  
14 expression.  
15  
16

17  
18  
19 In the un-imputed HapMap 3.2.1, at about 10% of all variant sites, fraction of heterozygous taxa exceeds  
20  
21 3%. Such sites are marked “DUP”, as most likely originating from duplication misalignments. Figure 6  
22  
23 shows the distribution of fraction of heterozygous sites per taxon for different versions of HapMap 3.2.1  
24  
25 release. While for the un-imputed genotypes the distribution peaks slightly below 1%, imputation  
26  
27 significantly shifts the peak to the left, down to about 0.5%. This is a consequence of most missing  
28  
29 genotypes being imputed to homozygotes. Interestingly, considering only sites in good local LD (marked  
30  
31 with the “LLD” flag) leads to distributions (both imputed and un-imputed) shifted towards higher  
32  
33 heterozygosities. This is understandable, as the LLD sites are typically those with higher minor allele  
34  
35 frequencies, where the chance of encountering a heterozygote is higher.  
36  
37  
38

39  
40  
41 In summary, besides the addition of more maize lines, the HapMap 3.2.1 release differs from the 3.1.1  
42  
43 release in three major aspects: 1) Improved rare allele calls: to increase the accuracy of the variants with  
44  
45 rare allele, the HapMap 3.2.1 pipeline applied more stringent read depth thresholds instead of the  
46  
47 population genetics based LD filter that could not be applied to sites with very low MAF; 2) The sites with  
48  
49 high percentage of heterozygous calls were flagged in the VCF files; 3) Missing data was imputed using  
50  
51 the LD KNN method. As summarized in Table 2, the VCF files of both datasets contain labels that flag the  
52  
53 characteristics of each of the sites. To effectively use this resource, it is recommended to filter the sites  
54  
55 based on the flags that are appropriate to the purpose of each project.  
56  
57  
58  
59  
60  
61  
62  
63  
64  
65

1  
2  
3  
4 When constructing the maize HapMap 3, the most serious problems we were facing can be attributed to  
5  
6 the use of a genome from a single individual (B73) as a reference for other, often very different species.  
7  
8 This is becoming the single limiting factor in the study of maize diversity, as well as breeding practice. The  
9  
10 only remedy is to move away from a single genome-based reference coordinate and adopt a pan-genome  
11  
12 based reference system that incorporates all major haplotypes of the species.  
13  
14

## 15 16 17 METHODS

### 18 19 20 Plant material

21  
22  
23  
24 Plant material used in this study was obtained mostly from maize inbred lines representing wide range of  
25  
26 *Zea mays* diversity. 103 of these lines, used previously in the HapMap2 project [1], include 60 improved  
27  
28 lines, including the parents of the maize nested association mapping (NAM) population [12], 23 maize  
29  
30 landraces and 19 wild relatives (teosinte lines, 17 *Z. mays ssp. parviglumis* and 2 *Z. mays ssp. mexicana*).  
31  
32  
33 Sequence datasets originating from these lines are referred to in Table 1 as “HapMap2” and “HapMap2  
34  
35 extra”. Majority of the remaining inbred lines originated from CAU (sequence dataset “CAU”) and include,  
36  
37 among others, “Chinese NAM” parent lines. Additional 89 inbred lines were provided by CIMMYT and  
38  
39 sequenced at BGI (dataset “CIMMYT/BGI”). The HapMap 3 population also contained one *Tripsacum* line  
40  
41 (TDD39103), one “mini-maize” line (MM-1A), and a few newly sequenced landraces. Overall, the number  
42  
43 of taxa in the initial, variant-discovery stages of the HapMap 3.1.1 project was 916.  
44  
45  
46

47  
48  
49 The sequence of 271 taxa from the libraries of the “282” panel [10] were added at a later stage (HapMap  
50  
51 3.2.1). DNA to construct these libraries was obtained from the collection that the NCRPIS distributes all  
52  
53 over the world. Additionally, the high-coverage data of Ref. [2], originating from 31 European and US  
54  
55 inbreds was also included. The total number of taxa genotyped in the HapMap 3.2.1 build is 1218.  
56  
57  
58  
59  
60  
61  
62  
63  
64  
65

1  
2  
3  
4 During the course of this work several of the taxa present in the sets of germplasm produced by the  
5  
6 different members of the consortium carry the same name. Since despite identical names such taxa  
7  
8 originated from different germplasm sources, they have all been kept separate for genotyping. For  
9  
10 example, it was discovered that new sequence marked as originating from line CML103 actually  
11  
12 represents material that is significantly more heterozygous from the line with the same name studied  
13  
14 previously in HapMap2 project. Also, the Mo17 sequence originating at CAU has been treated as taxon  
15  
16 separate from Mo17 and CAUMo17. In most of those cases, a prefix indicating the origin of the sequence  
17  
18 data has been added to the taxa name in order to keep them separated (e.g., “282set\_” or “german\_”).  
19  
20  
21  
22  
23

## 24 Sequencing

25  
26 Sequencing has been performed over several years using various generations of Solexa/Illumina  
27  
28 instruments and library preparation protocols, giving paired end reads from 44 to 201 bp long. Overall,  
29  
30 113.702 billion reads were obtained, containing 12,497 billion base pairs, giving on average 4.4x coverage  
31  
32 per line (assuming 2.3 Gb genome size). However, as shown in Table 1, coverage was not uniform among  
33  
34 all lines. For a few lines, sequence generated previously in the context of HapMap2 project was  
35  
36 augmented with reads from recent re-sequencing which brought the median coverage of the HapMap2  
37  
38 lines to 5x, with average coverage equal to 7.8x and standard deviation of 7.2x. All NAM parent lines are  
39  
40 covered to 10x or better. Most of the 89 lines provided by CIMMYT and sequenced at BGI have coverage  
41  
42 exceeding 10x. The recent re-sequencing of the “282” panel resulted in coverage between 1.7 and 36x,  
43  
44 averaging 6.5x. Coverage of the 31 “German” lines for Ref. [2] ranges from 8.3 to 59x, with average of  
45  
46 17.4x. Majority of the inbred lines originated from CAU have been sequenced at a lower coverage (1-2x).  
47  
48  
49  
50  
51  
52  
53 The list of all lines used in HapMap 3 with the corresponding coverage is given in Additional file 1.  
54  
55  
56  
57  
58  
59  
60  
61  
62  
63  
64  
65

## Alignment

Due to the use of different versions of Solexa/Illumina sequencing equipment, the base qualities in different input FASTQ files are given in different encodings. Prior to alignment, all base qualities have been converted to phred+33 scale. Reads were then aligned to B73 reference (AGP v3) as paired-end using bwa mem aligner (1) with default options. In 72 read sets (Illumina lanes), for technical reasons a high (6%-54%) fraction of paired-end fragments was found to be shorter than reads, so that the two ends contained a part of Illumina adapter and were reverse complements of each other. For such “read-through” fragments, the remnants of Illumina adapter sequences were clipped using TRIMMOMATIC [13] and only one read was used and aligned as single-end. The bwa mem aligner is capable of clipping the ends of reads and splitting each read in an attempt to map its different parts to different location on the reference. As a result, typically over 95% of reads are reported as mapped. However, the fraction of reads with non-zero mapping quality (negative log of the probability that a read has been placed in a wrong location) is much lower – typically only 40-50%. Figure 7 shows a typical distribution of the mapping quality obtained from bwa mem alignment. In practice, we only used alignments with mapping quality of at least 30. A base was counted towards allele depth if its base quality score was at least 10.

It is well known that alignment may be especially ambiguous when reads contain indels with respect to the reference. In such cases, multiple-sequence realignment approaches have been proposed [4] to find the correct sequence and location of an indel and avoid spurious flanking SNPs. Since indels are not the primary focus of this work and since the realignment is computationally very expensive, it has not been performed by the HapMap 3 pipeline. Thus, although indels and SNPs in their immediate vicinity have been retained in the HapMap 3 VCF files, they are less reliable and have therefore been marked with “N15” label for easy filtering.

## Genotyping pipeline

Raw genotypes were obtained using a custom-built multi-threaded java code. First, the code executes samtools mpileup command (thresholds on the base and mapping quality are imposed here) for each taxon individually, processing a certain portion of the genome. On a multi-core machine, several such mpileup processes (i.e., for several taxa) can be run concurrently as separate threads. Since we are predominantly interested in calling SNPs, we use a simplified indel representation where insertions and deletions with respect to reference are treated as additional alleles “I” and “D”, respectively, regardless of length and actual sequence of the indel. Read depths and average base qualities of all six alleles (A, C, G, T, I, and D) are extracted from samtools mpileup output for each taxon at each genomic position and stored in an array shared between all threads. The amount of memory available on the machine along with the number of taxa determine the upper limit on the size of this array, and therefore – the maximum size of chromosome chunk which can be processed at one time. As base quality of I and D alleles we took the value corresponding to the base directly preceding the indel on the reference.

Extraction of allelic depths for all genomic positions is time consuming, which presents a major obstacle if joint genotyping needs to be re-run, for example, upon extending the taxa set (the so-called “N+1 problem”). It is therefore advantageous to run the depth extraction only once for each taxon and save the obtained depths on disk to be retrieved (rather than re-calculated) during the genotyping step. This way, when the taxa set for genotyping is extended, mpileup step has to be run only for the newly added taxa. Thus, the program features an option to save allelic depths and average qualities in specially designed data structures stored in HDF5 files – one such file per taxon per chromosome. To save space, each allele depth and average quality is stored as one byte, which allows exact representation of integers from 0 to 182, while higher integers (up to about 10,000) are represented approximately by negative byte values through a logarithmic formula with carefully chosen base. Depths and qualities are stored only for sites

1  
2  
3  
4 with non-zero coverage. The details of the storage format and integer representation in terms of byte  
5  
6 variables are given in Additional file 2.  
7  
8

9  
10 Once the allelic depths for all taxa and a given chunk of the genome are available in shared memory, each  
11  
12 site is evaluated for presence of a tentative SNP. On a multi-core machine, the set of sites within the  
13  
14 genome chunk is divided into subsets processed in parallel on different cores. Sites with less than 10 taxa  
15  
16 with read coverage and those with only reference allele present are ignored. For all other sites, genotypes  
17  
18 are called for all taxa using a simple likelihood model with a uniform error rate [14] assumed at 1%.  
19  
20 Alternative alleles are then sorted according to their allele frequencies and up to two most abundant  
21  
22 alleles are kept, as decided by the segregation test described in the next Section. Sites for which all taxa  
23  
24 turn out to be reference homozygotes (which may happen despite non-reference alleles being present in  
25  
26 the mapped reads) are skipped. Raw variant set obtained in this way is then subject to extensive filtering  
27  
28 with the intention of reducing the number of false positives resulting from misalignments.  
29  
30  
31  
32

## 33 34 Filtering

### 35 36 Segregation test (ST) filter

37  
38 For each pair of alleles obtained in the genotyping step, a 2 by N (where N is the number of taxa)  
39  
40 contingency table is constructed, containing depths of the first allele in row 1 and depths of the second  
41  
42 allele in row 2. The Fisher exact test (FET) is then performed to assess how likely such a table is to occur  
43  
44 by chance. If the expected values of the array elements are sufficiently large, the p-value from FET is  
45  
46 approximated by that from the computationally efficient chi-square test. However, in most cases  
47  
48 encountered here, expensive simulation is needed to obtain sufficiently accurate p-value. To reduce  
49  
50 computational burden, we adopted a hybrid approach based on an empirical observation that for  
51  
52 statistically insignificant cases (p-values larger than 0.2) the chi-square test results in a de facto lower  
53  
54 bound to exact p-values. Thus, the chi-square test is performed first for each site and if the p-value from  
55  
56  
57  
58  
59  
60  
61  
62  
63  
64  
65

1  
2  
3  
4 this test is below 0.2, more exact p-value is obtained from a simulation procedure. The simulation  
5  
6 procedure used here, implemented in Java, is the same as the one implemented in R package [15]. An  
7  
8 alternative allele is kept if at least one contingency table involving this allele has p-value smaller or equal  
9  
10 to 0.01. If none of the alternative alleles survive the ST filter, the site is skipped (not reported in output).  
11  
12  
13 The ST filter tends to eliminate variant sites resulting from random sequencing errors.  
14  
15

#### 16 GBS anchor map and IBD filter

17  
18 Given a set of trustworthy SNPs and a diverse set of 916 taxa it is possible to identify, for an arbitrary  
19  
20 region of the genome, a number of taxa pairs which are identical by descent (IBD) and are therefore  
21  
22 expected to have identical genotypes in this region. If known, these IBD pairs can be used as a powerful  
23  
24 filter eliminating variant which violate IBD constraints.  
25  
26  
27

28  
29 To determine the IBD regions, we used the first step of our pipeline to call genotypes for our 916 taxa on  
30  
31 the set of GBS v2.7 sites [7, 8] which tend to concentrate in relatively well-conserved low-copy regions of  
32  
33 the genome and can therefore be considered reliable. This set of 954,384 sites was filtered to include only  
34  
35 SNP (not indel) sites for which the p-value from the segregation test was below 0.05 and which were more  
36  
37 than 5 bp away from any indel. The set of genotypes at 475,272 sites obtained in this way, which will be  
38  
39 referred to as GBS anchor, agree well with those from GBS on 167 taxa present in both sets. Alleles  
40  
41 detected by the HapMap 3 pipeline agreed with those from GBS at 94% of the GBS sites. At 90% of the  
42  
43 sites, fraction of (non-missing data) taxa with genotypes in agreement with those from GBS was at or  
44  
45 above 85%. Genotypes different from GBS ones were observed for 82 taxa. These differences were most  
46  
47 frequent (up to 19% of all sites) for teosinte lines.  
48  
49  
50  
51  
52

53  
54 The GBS anchor was used to compute the genetic distance (identity by state) between any two of the 916  
55  
56 lines in windows containing 2000 GBS sites each (about 8.5 Mbp on average). If the genetic distance within  
57  
58 such a window was  $\leq 0.02$  (about 10 times smaller than the mean distance across all pairs), the two lines  
59  
60  
61  
62  
63  
64  
65

1  
2  
3  
4 were considered to be in IBD. At least 200 comparable GBS sites (i.e., non-missing data simultaneously on  
5  
6 both lines being compared) were assumed necessary to make the genetic distance calculation feasible.  
7  
8

9  
10 The number of taxa involved in IBD relationships in any given window were between 385 (start of  
11  
12 chromosome 10) and 757 (middle of chromosome 7) and averaged 588, leading to large numbers of IBD  
13  
14 contrasts, ranging from 3,710 (beginning of chromosome 4) to 42,890 (middle of chromosome 7), and  
15  
16 averaging 13,500.  
17  
18

19  
20 The raw (ST-filtered) genotypes were checked against the IBD pairs in various regions, using a procedure  
21  
22 which counts, for each site, numbers of base matches and mismatches for each allele present at the site.  
23  
24 If the match/mismatch ratio is at least 2 for at least two alleles, or if only one allele is present in all IBD  
25  
26 contrasts, the site is considered as passing the IBD filter. Such a filter is less powerful for sites where all  
27  
28 bases in IBD lines are major allele homozygotes (i.e., the SNP being evaluated occurs in lines not involved  
29  
30 in IBD pairs). Formally, such a site passes IBD filter, but this is statistically easier to achieve than agreement  
31  
32 involving minor alleles, so the actual SNP is not strongly confirmed. These uncertain sites, mostly with low  
33  
34 minor allele frequency, are labeled “IBD1” in the HapMap 3 VCF files and constitute about 50% of all  
35  
36 HapMap 3 sites.  
37  
38  
39  
40

#### 41 Linkage Disequilibrium (LD) filter

42  
43  
44 Any true SNP should be in local linkage with other nearby SNPs. This observation gives rise to another  
45  
46 filter used in this work, referred to as the LD filter. For each variable site surviving the ST and IBD filters,  
47  
48 we evaluate LD with each site of the GBS anchor. As the LD measure we chose the p-value from a 2 by 2  
49  
50 contingency table of taxa counts corresponding to the four haplotypes (AB,Ab,aB,ab). For simplicity,  
51  
52 heterozygous genotypes were treated as homozygous in minor allele. For a pair of sites to be tested for  
53  
54 LD, the following three conditions had to be satisfied to make the calculation meaningful: i) the two sites  
55  
56  
57  
58  
59  
60  
61  
62  
63  
64  
65



1  
2  
3  
4 were at least 2,500bp apart, ii) there were at least 40 taxa with non-missing genotypes at both sites being  
5 compared, and iii) at least 2 taxa with minor allele had to be present at each of the two sites.  
6  
7  
8

9  
10 Filtering procedure executed for each site is summarized in Figure 8. First, LD between the given site and  
11 all sites in GBS anchor was computed and up to 20 best LD hits (the ones with lowest p-values) were  
12 collected. If the p-value of the best hit exceeded  $1E-6$  (which roughly corresponds to the peak of the  
13 overall distribution of p-values), the site was rejected. Otherwise, it was determined whether the set of  
14 best hits contained any local hits, i.e., hits to GBS sites on the same chromosome within 1 Mbp of the site  
15 in question and with the p-value smaller than 10 times the p-value of the best hit. If no such local hits  
16 were found, the site was rejected, otherwise it was kept and marked as a site in Local LD using the flag  
17 “LLD”. Note that the procedure defined this way filters out sites with only non-local LD hits as well as  
18 those with only weak LD signal. Sites in local LD as well as those for which LD could not be assessed  
19 (because of low minor allele frequency or missing data) pass the filter.  
20  
21  
22  
23  
24  
25  
26  
27  
28  
29  
30  
31  
32

## 33 Imputation

34  
35  
36  
37 In the HapMap 3.2.1 pipeline, the ST- and IBD-filtered genotypes, after the application of the additional  
38 “>1,>2” depth-based filter, were processed through the LD KNN imputation procedure based on Ref. [11]  
39 to fill in the missing data. The procedure is a version of the “K nearest neighbors” routine where the  
40 “nearest neighbors” of a given taxon are selected based on genetic distance computed using variant sites  
41 in good local LD. Specifically, for a given target site, a list of up to 70 sites in best LD (as given by the  $R^2$   
42 measure) with it is compiled by checking all surrounding sites within 600Kb characterized by  
43 heterozygosity lower than 3% and more than 50% taxa with non-missing genotypes. Then, at the same  
44 target site, for each target taxon, up to 30 “nearest neighbor” taxa are selected, giving the lowest genetic  
45 distance from the target taxon. Genetic distances are computed using the set of local LD sites selected in  
46 the previous step. Taxa with less than 50% non-missing genotypes at LD sites, missing genotype at the  
47  
48  
49  
50  
51  
52  
53  
54  
55  
56  
57  
58  
59  
60  
61  
62  
63  
64  
65

1  
2  
3  
4 target position, having distance from the current taxon larger than 0.1, or resulting in less than 10 common  
5  
6 LD sites on which the distance can be calculated, are excluded from distance calculation process.  
7  
8 Genotypes of the selected nearest neighbor taxa at the target site are stored in memory along with the  
9  
10 genetic distances from the target taxon. This information is the used to compute a weight  $w_i$  of each  
11  
12 neighbor genotype  $g$  as follows:  
13  
14

$$w_g = \sum_i \frac{1}{1 + 70d_{gi}},$$

15  
16  
17  
18  
19  
20  
21 where the summation index  $i$  runs over all neighboring taxa with genotype  $g$  at the target site, and  $d_{gi}$  is  
22  
23 the distance of taxon  $i$  from the target taxon. The genotype with the highest weight is considered the  
24  
25 imputed genotype (of the target taxon at the target site) provided its weight is at least 10 times larger  
26  
27 than that of the second-best candidate genotype. Otherwise the imputation is considered inconclusive  
28  
29 and the imputed genotype is set to “unknown” (missing data), as it is in the case when no close neighbors  
30  
31 of the current taxon could be found. If a genotype imputed to “unknown” occurs at a site where MAF<1%,  
32  
33 it is automatically converted into major allele homozygote.  
34  
35  
36

37  
38 The imputation procedure is run for each genotype in the input file. However, in the output only the  
39  
40 originally missing genotypes are updated to imputed ones, whereas all others are left unchanged, even if  
41  
42 classified differently. On the other hand, all imputed genotypes are used during a run to collect imputation  
43  
44 statistics. The “transition matrix” showing how many genotypes originally in a given class were imputed  
45  
46 into other classes is an indication of the accuracy of the input genotypes. Error rates calculated from the  
47  
48 transition data are given in Table 3.  
49  
50  
51

## 52 53 54 AVAILABILITY OF DATA 55 56

57 At present, reads from all datasets is available in the form of BAM files (with reads aligned to AGP v3  
58  
59 reference) on CYVERSE data store (formerly iPlant, <http://www.cyverse.org/data-store>), in directories  
60  
61  
62  
63  
64  
65

1  
2  
3  
4 /iplant/home/shared/panzea/raw\_seq\_282/bam (dataset “282-2x” and “282-4x”),  
5  
6 /iplant/home/shared/panzea/hapmap3/bam\_germanlines (“German” dataset), and  
7  
8 /iplant/home/shared/panzea/hapmap3/bam (other datasets). Raw reads from the  
9  
10 “German” dataset are also available from NCBI BioProject with accession PRJNA260788.  
11  
12  
13

14 The set of HapMap 3.1.1. polymorphisms determined for 916 taxa (from datasets “HapMap2”,  
15  
16 “HapMap2 extra”, “CAU”, and “CIMMYT/BGI”) is available in VCF format on CYVERSE data store in the  
17  
18 directory /iplant/home/shared/panzea/hapmap3/hmp311, in files  
19  
20 c\*\_hmp311\_q30.vcf.gz (one file per chromosome, where “\*” stands for chromosome 1-10).  
21  
22 Additionally, files c\*\_hmp311\_q1.vcf.gz (in the same location) contain test results obtained with  
23  
24 mapping quality threshold equal to 1.  
25  
26  
27  
28

29 The HapMap 3.2.1 variants for 1210 taxa (916 initial Hapmap 3.1.1 taxa + 263 taxa from “282-2x” set +  
30  
31 31 “German” lines) are available from  
32  
33 /iplant/home/shared/panzea/hapmap3/hmp321/unimputed, in files  
34  
35 mergedflt\_c\*.vcf.gz (un-imputed results) and in  
36  
37 /iplant/home/shared/panzea/hapmap3/hmp321/imputed, in files  
38  
39 mergedflt\_c\*.imputed.vcf.gz (imputed results).  
40  
41  
42  
43

44 Files c\*\_282\_onHmp321.vcf.gz in CYVERSE directory

45  
46 /iplant/home/shared/panzea/hapmap3/hmp321/unimputed/282\_libs\_2015 contain  
47  
48 un-imputed genotypes on HapMap 3.2.1 sites from the full depth data available for the “282” panel (271  
49  
50 taxa, datasets “282-2x” + “282-4x”).  
51  
52  
53  
54  
55  
56  
57  
58  
59  
60  
61  
62  
63  
64  
65

1  
2  
3  
4 **LIST OF ABBREVIATIONS**  
5  
6

7 International Maize and Wheat Improvement Center (CIMMYT), Segregation test (ST), Identity-by-descent  
8  
9 (IBD), Genotyping-by-sequencing (GBS), Linkage Disequilibrium (LD), Minor Allele Frequency (MAF),  
10  
11 Nested Association Mapping (NAM), Single Nucleotide Polymorphism (SNP), Insertion-Deletion (Indel)  
12  
13

14  
15 **FUNDING**  
16  
17

18 This work has been funded by grants from National Key Basic Research Program of China (2014CB138206),  
19  
20 National Science Foundation of China (Grant #31271736), Bill & Melinda Gates Foundation (Yunbi Xu),  
21  
22 National Science Foundation IOS #1238014, USDA-ARS, and USDA NIFA grant 2009-65300-05668.  
23  
24  
25

26 **COMPETING INTERESTS**  
27  
28

29 The authors have no competing interests to declare.  
30  
31

32 **REFERENCES**  
33

- 34 1. Chia J-M, Song C, Bradbury PJ, Costich D, Leon N de, Doebley J, et al. Maize HapMap2 identifies extant  
35 variation from a genome in flux. *Nat Genet* 2012;44:803–7. doi:10.1038/ng.2313.  
36  
37 2. Unterseer S, Bauer E, Haberer G, Seidel M, Knaak C, Ouzunova M, et al. A powerful tool for genome  
38 analysis in maize: development and evaluation of the high density 600 k SNP genotyping array. *BMC*  
39 *Genomics* 2014;15:823. doi:10.1186/1471-2164-15-823.  
40  
41 3. Abecasis GR, Auton A, Brooks LD, DePristo MA, Durbin RM, Handsaker RE, et al. An integrated map  
42 of genetic variation from 1,092 human genomes. *Nature* 2012;491:56–65. doi:10.1038/nature11632.  
43  
44 4. DePristo MA, Banks E, Poplin R, Garimella KV, Maguire JR, Hartl C, et al. A framework for variation  
45 discovery and genotyping using next-generation DNA sequencing data. *Nat Genet* 2011;43:491–8.  
46 doi:10.1038/ng.806.  
47  
48 5. Schnable PS, Ware D, Fulton RS, Stein JC, Wei F, Pasternak S, et al. The B73 maize genome: complexity,  
49 diversity, and dynamics. *Science* 2009;326:1112–5. doi:10.1126/science.1178534.  
50  
51 6. Gore MA, Chia J-M, Elshire RJ, Sun Q, Ersoz ES, Hurwitz BL, et al. A first-generation haplotype map of  
52 maize. *Science* 2009;326:1115–7. doi:10.1126/science.1177837.  
53  
54 7. Glaubitz JC, Casstevens TM, Lu F, Harriman J, Elshire RJ, Sun Q, Buckler ES. TASSEL-GBS: a high capacity  
55 genotyping by sequencing analysis pipeline. *PLoS ONE* 2014;9:e90346.  
56 doi:10.1371/journal.pone.0090346.  
57  
58 8. Romay MC, Millard MJ, Glaubitz JC, Peiffer JA, Swarts KL, Casstevens TM, et al. Comprehensive  
59 genotyping of the USA national maize inbred seed bank. *Genome Biol* 2013;14:R55. doi:10.1186/gb-  
60 2013-14-6-r55.  
61  
62 9. Li H, Handsaker B, Wysoker A, Fennell T, Ruan J, Homer N, et al. The Sequence Alignment/Map format  
63 and SAMtools. *Bioinformatics* 2009;25:2078–9. doi:10.1093/bioinformatics/btp352.  
64  
65

10. Flint-Garcia SA, Thuillet A-C, Yu J, Pressoir G, Romero SM, Mitchell SE, et al. Maize association population: a high-resolution platform for quantitative trait locus dissection. *Plant J* 2005;44:1054–64. doi:10.1111/j.1365-313X.2005.02591.x.
11. Money D, Gardner K, Migicovsky Z, Schwaninger H, Zhong G-Y, Myles S. LinkImpute: Fast and Accurate Genotype Imputation for Nonmodel Organisms. *G3* (Bethesda) 2015;5:2383–90. doi:10.1534/g3.115.021667.
12. McMullen MD, Kresovich S, Villeda HS, Bradbury P, Li H, Sun Q, et al. Genetic properties of the maize nested association mapping population. *Science* 2009;325:737–40. doi:10.1126/science.1174320.
13. Bolger AM, Lohse M, Usadel B. Trimmomatic: a flexible trimmer for Illumina sequence data. *Bioinformatics* 2014;30:2114–20. doi:10.1093/bioinformatics/btu170.
14. Catchen JM, Amores A, Hohenlohe P, Cresko W, Postlethwait JH. Stacks: building and genotyping Loci de novo from short-read sequences. *G3* (Bethesda) 2011;1:171–82. doi:10.1534/g3.111.000240.
15. Patefield WM. Algorithm AS 159: An Efficient Method of Generating RxC Tables with Given Row and Column Totals. *Applied Statistics* 1981;30:91–7.

## FIGURES

Figure 1: Overview of HapMap 3 pipeline. The exact numbers of variant sites in HapMap 3.1.1 and HapMap 3.2.1 are 61,228,639 and 83,153,144, respectively.

Figure 2: Overlap between various classes of HapMap 3.1.1 polymorphic sites.

Figure 3: Polymorphic sites detected by HapMap 3 pipeline based on two read mapping quality thresholds.

Figure 4: Distribution of inbreeding coefficient for variant sets obtained with two read mapping quality thresholds.

Figure 5: Overlap between HapMap 3.1.1 and HapMap 3.2.1 variant sites.

Figure 6: Distribution of fraction of heterozygous sites per taxon for un-imputed and imputed HapMap 3.2.1. Curves marked “LLD” have been obtained considering only sites verified in HapMap 3.1.1 to be in good local LD.

1  
2  
3  
4  
5  
6  
7  
8  
9  
10  
11  
12  
13  
14  
15  
16  
17  
18  
19  
20  
21  
22  
23  
24  
25  
26  
27  
28  
29  
30  
31  
32  
33  
34  
35  
36  
37  
38  
39  
40  
41  
42  
43  
44  
45  
46  
47  
48  
49  
50  
51  
52  
53  
54  
55  
56  
57  
58  
59  
60  
61  
62  
63  
64  
65

Figure 7: Cumulative distribution of mapping quality from BWA mem alignment of 125,441,950 150bp reads from line A272.

Figure 8: Linkage Disequilibrium-based filtering flowchart.

## ADDITIONAL FILES

Additional file 1: HapMap3TaxaAndCoverage.xlsx – spreadsheet with a list of all lines used in HapMap 3 with their corresponding coverage

Additional file 2: DepthFormatDetails.pdf - details of byte representation and storage format used for allelic depths

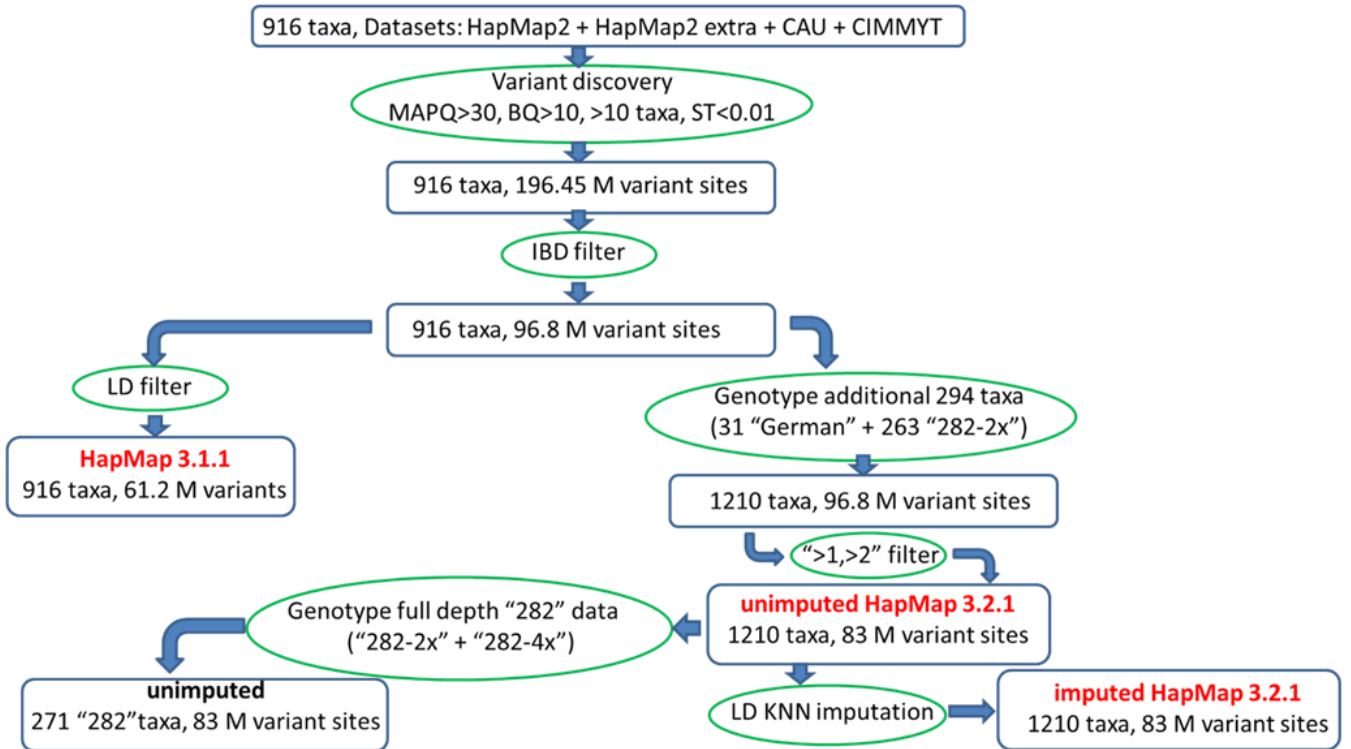

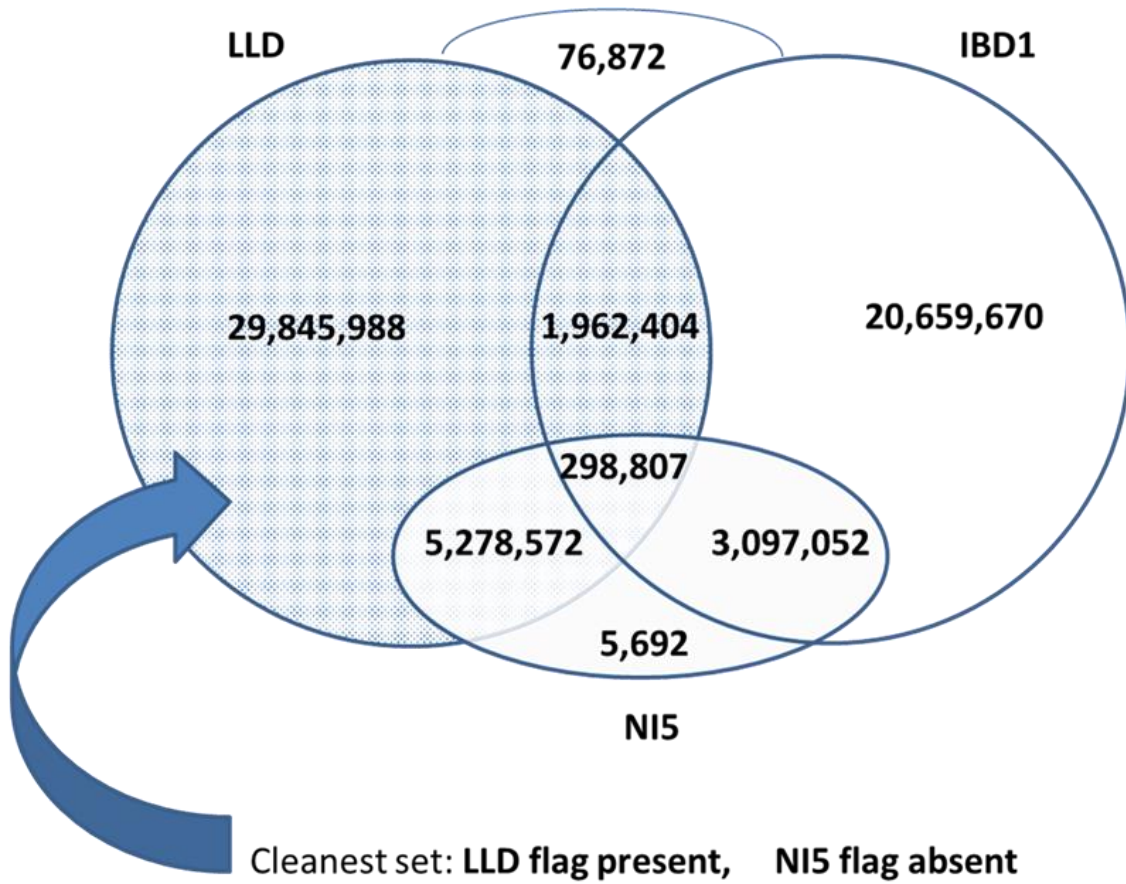



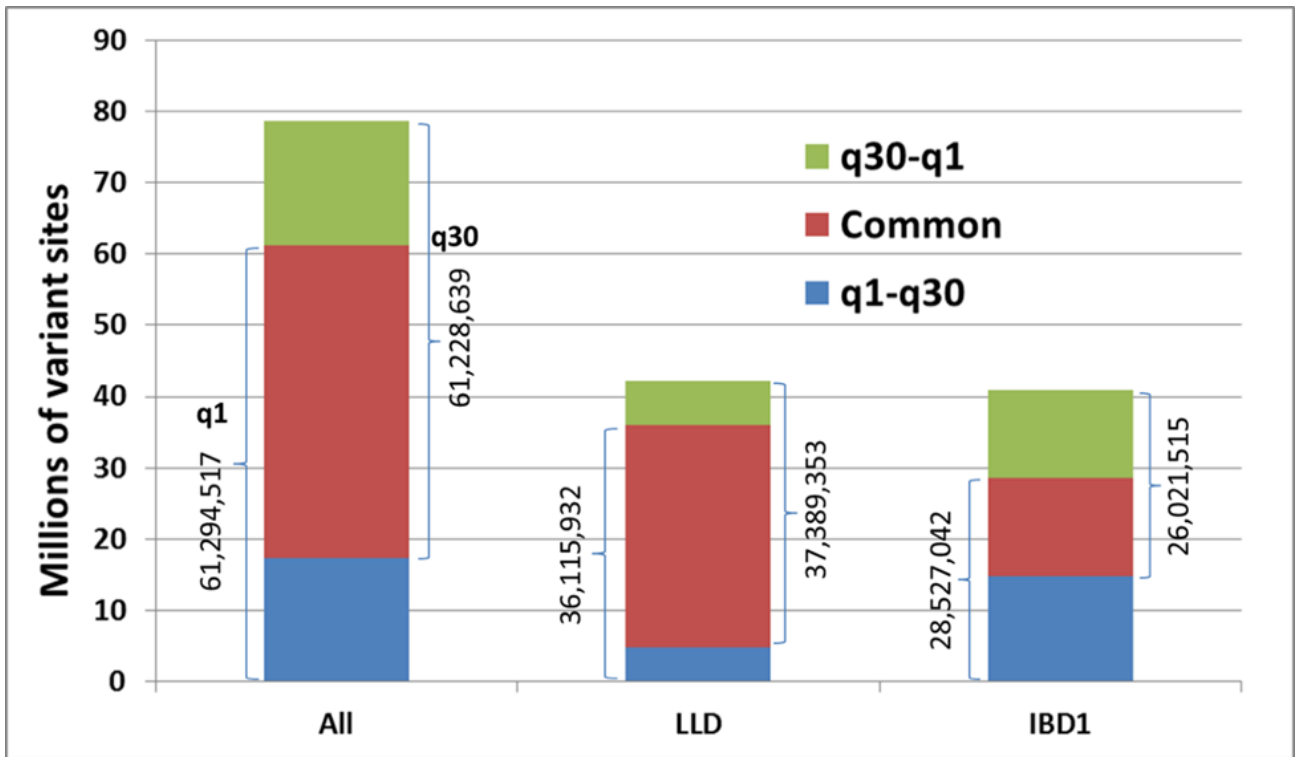

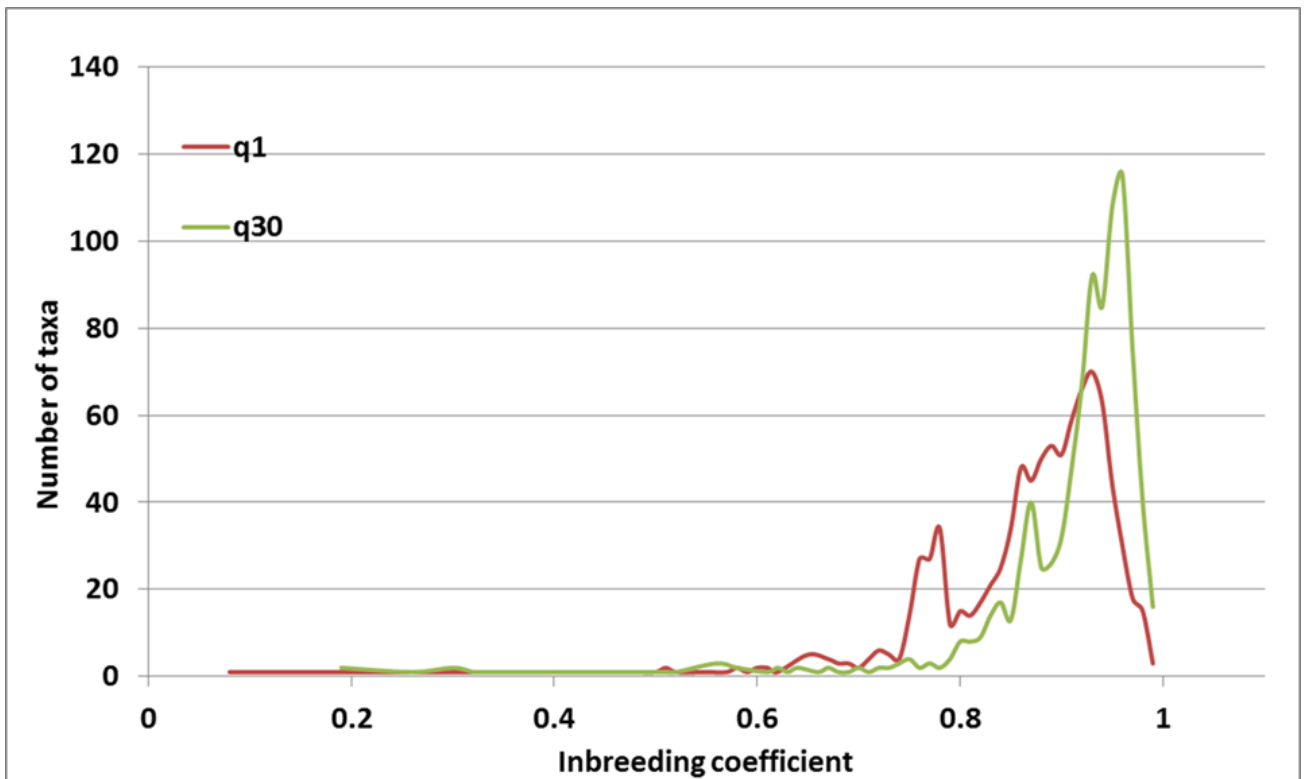

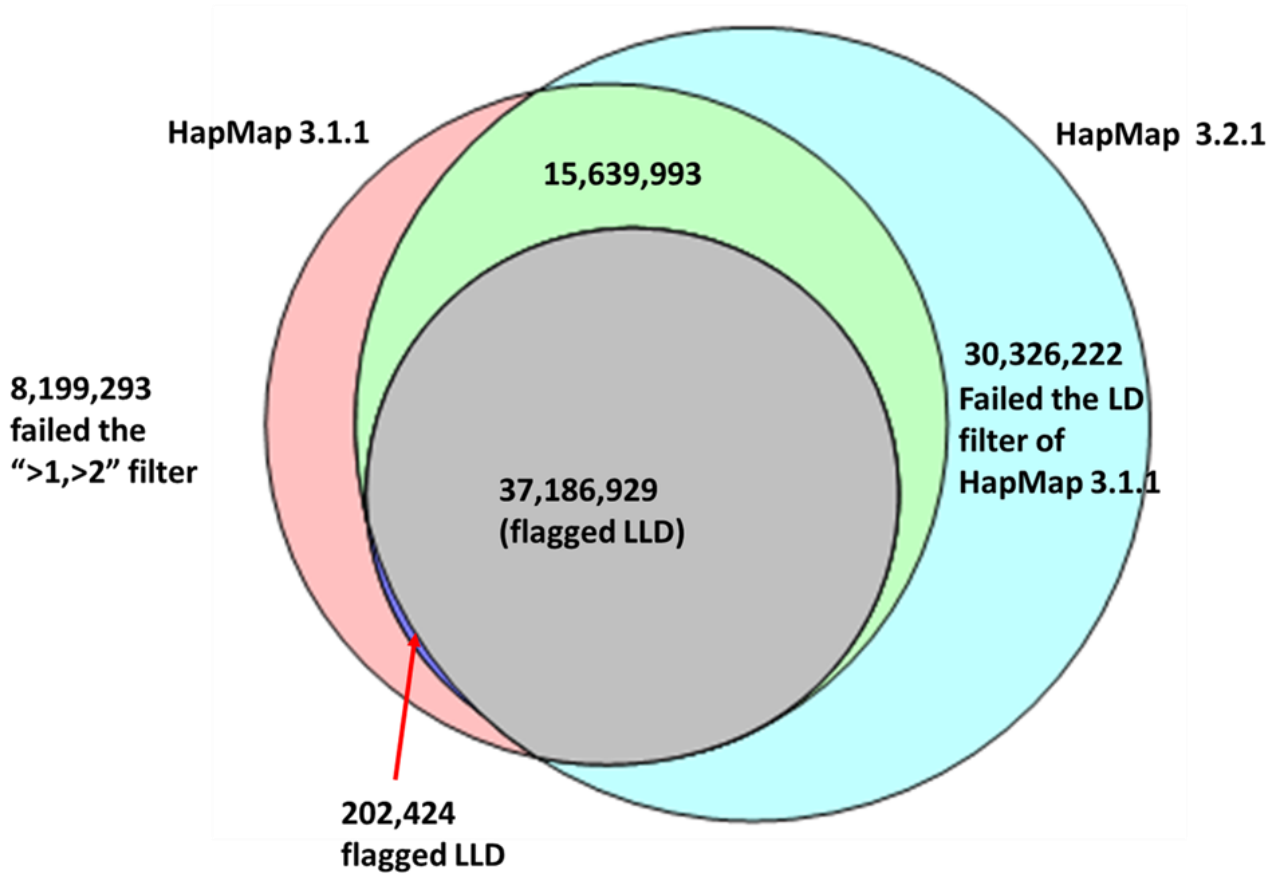

Figure 6

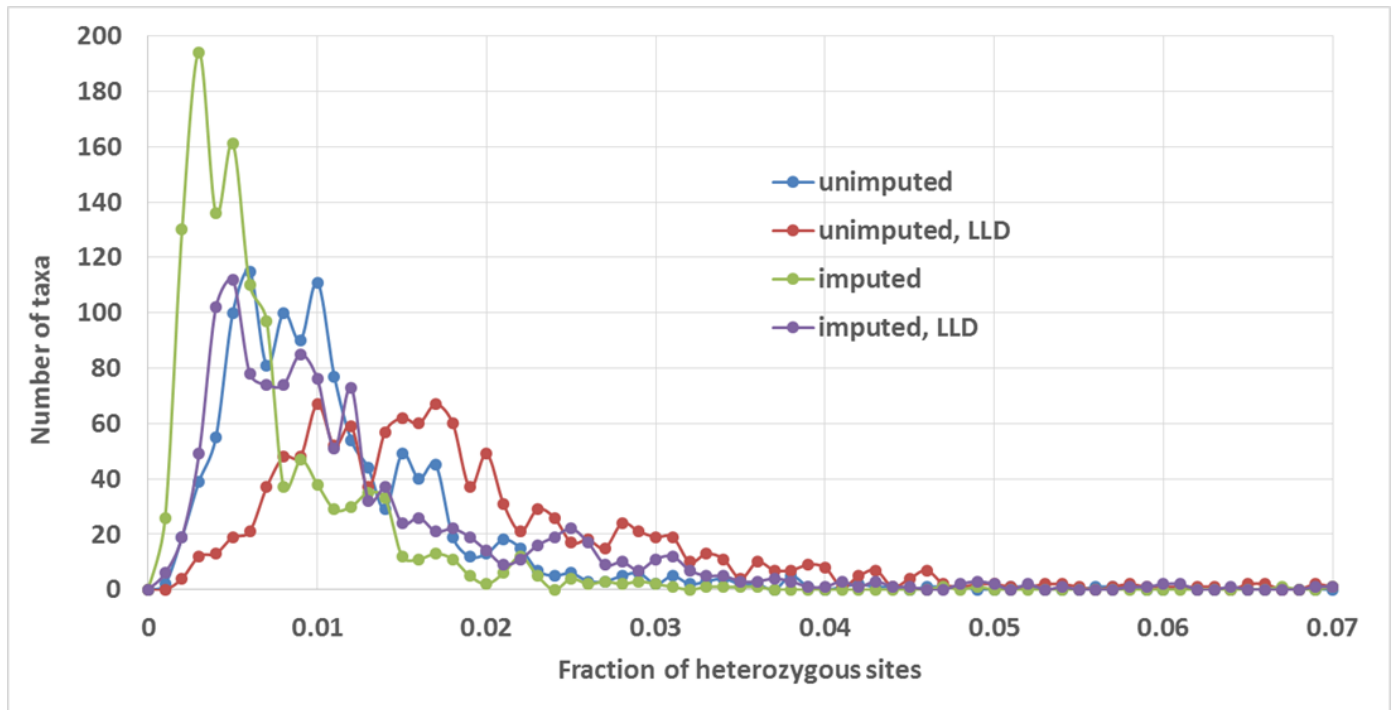

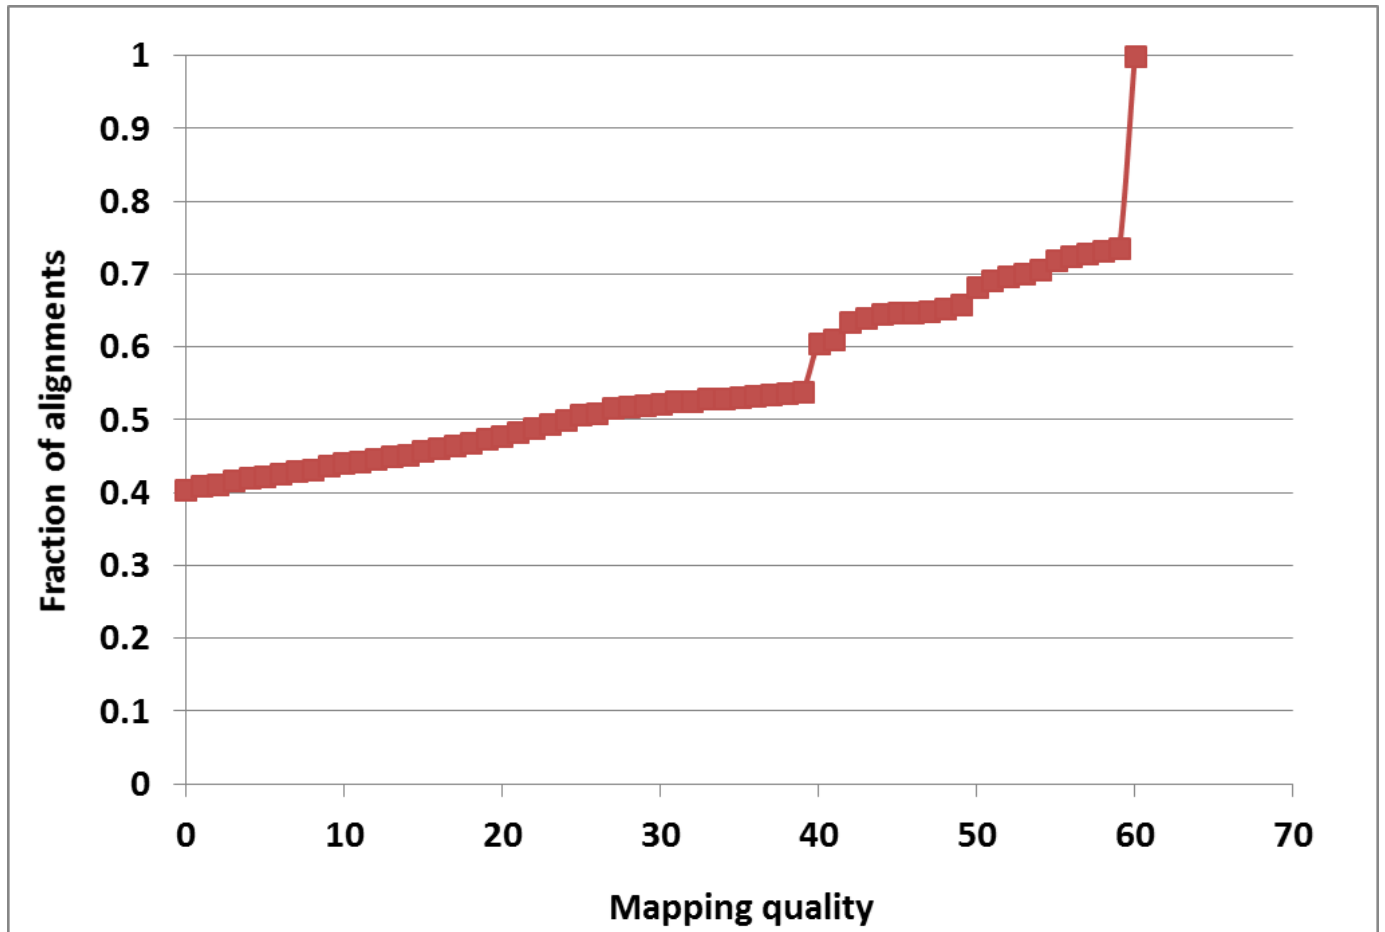

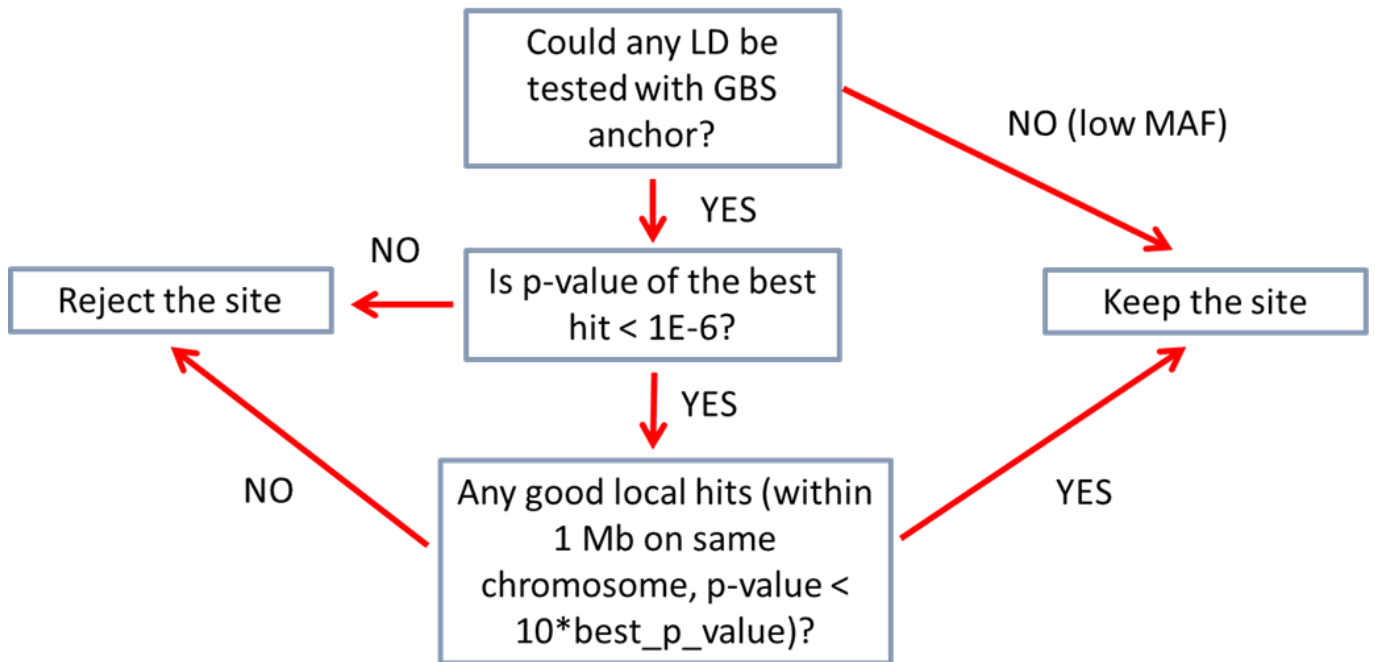

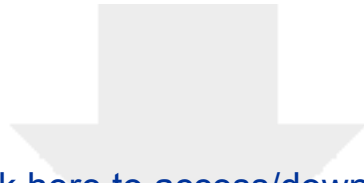

Click here to access/download  
**Supplementary Material**  
HapMap3TaxaAndCoverage.xlsx

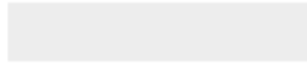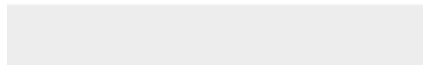



Click here to access/download  
**Supplementary Material**  
DepthFormatDetails.pdf



Supplement: gix134_giga-d-17-00007_original_submission.pdf [file gix134_giga-d-17-00007_original_submission.pdf]
